# Supplementary material
Source: PubMed Central journal article supplement (PMC4505632)
Supplement: JVI.00467-15_zjv999090604so1.pdf [file JVI.00467-15_zjv999090604so1.pdf]

**Supplementary Table 1.-** Accession numbers of sequences used in this article.

| <b>Accession Number</b>                        | <b>Author</b>             | <b>Reference</b> |
|------------------------------------------------|---------------------------|------------------|
| AB754590; AB761609-AB761611                    | Saikusa et al. 2012       | §                |
| AB846651-AB846657                              | Okamoto et al. 2013       | §                |
| AB846662                                       | Okamoto et al. 2010       | [1]              |
| AB860223-AB860240                              | Kim et al. 2014           | [2]              |
| AF065254-AF065256; AF065258                    | Peret et al. 1998         | [3]              |
| AF065405-AF065410                              | Sullender et al. 1998     | [4]              |
| AF193304-AF193327                              | Choi et al. 2000          | [5]              |
| AF516119                                       | Frabasile et al 2003      | [6]              |
| AF512538; AF512549-AF512551                    | Lim et al. 2003           | [7]              |
| AY343549-AY343660                              | Zlateva et al. 2004       | [8]              |
| AY465931-AY465951                              | Midilli,K et al. 2003     | §                |
| AY524579-AY524663; AY660667-AY660679           | Scott et al. 2004         | [9]              |
| AY571776-AY571777                              | de Sierra et al. 2004     | [10]             |
| AY728167-AY728170                              | Mao,H. et al. 2004        | §                |
| AY773286-AY773288; AY773290; AY773293-AY773301 | Scott et al. 2006         | [11]             |
| AY910769-AY910823                              | Viegas et al. 2005        | [12]             |
| AY911262                                       | Lo et al. 2005            | [13]             |
| DQ985080-DQ985135                              | Zlateva et al. 2007       | [14]             |
| DQ985744-DQ985748                              | Midilli,K et al. 2006     | §                |
| EU025187-EU025245                              | Montieri et al. 2007      | [15]             |
| FJ157343-FJ157348                              | Xiong,Y., et al. 2008     | §                |
| FJ948820                                       | Widjojatmodjo et al. 2010 | [16]             |
| HQ699263-HQ699286                              | Baek et al. 2012          | [17]             |

| <b>Accession Number</b>                                                                                                                                                                                                                                           | <b>Author</b>              | <b>Reference</b> |
|-------------------------------------------------------------------------------------------------------------------------------------------------------------------------------------------------------------------------------------------------------------------|----------------------------|------------------|
| HQ731687; HQ731689; HQ731691-HQ731694; HQ731699-HQ731701; HQ731703-HQ731706; HQ731710; HQ731712-HQ731713; HQ731715-HQ731716; HQ731719-HQ731721; HQ731723; HQ731725-HQ731741; HQ731755; HQ731755-HQ731759; HQ731761-HQ731764; HQ731766-HQ731769; HQ731773-HQ731780 | Gaunt et al. 2011          | [18]             |
| JF500106-JF500111                                                                                                                                                                                                                                                 | Viegas et al. 2011         | §                |
| JF714705-JF714706                                                                                                                                                                                                                                                 | Almajhdi et al. 2013       | [19]             |
| JF920046-JF920055; JF920057-JF920059; JF920061-JF920062; JF920065; JF920067; JF920069                                                                                                                                                                             | Rebuffo-Scheer et al. 2011 | [20]             |
| JF979145-JF979148; JF979149; JF979151-JF979153; JF979155-JF979157                                                                                                                                                                                                 | Balmaks et al. 2013        | [21]             |
| JN257693-JN257703                                                                                                                                                                                                                                                 | Eshaghi et al. 2012        | [22]             |
| JQ322971-JQ322977                                                                                                                                                                                                                                                 | Deng et al. 2011           | §                |
| JQ901447-JQ901458; JX015479-JX015499                                                                                                                                                                                                                              | Tan et al. 2012            | [23]             |
| JX069798-JX069803                                                                                                                                                                                                                                                 | Lorenzi et al. 2012        | §                |
| JX131637-JX131638; JX131640-JX131645                                                                                                                                                                                                                              | Farrag et al. 2012         | §                |
| JX182791-JX182864                                                                                                                                                                                                                                                 | Machado et al. 2012        | §                |
| JX198105-JX198138                                                                                                                                                                                                                                                 | Tapia et al, 2014          | [24]             |
| JX513269-JX513388                                                                                                                                                                                                                                                 | Moura et al. 2012          | §                |
| JX627336                                                                                                                                                                                                                                                          | Lee et al. 2012            | [25]             |
| JX645776-JX645877                                                                                                                                                                                                                                                 | Houspie et al. 2013        | [26]             |
| JX661568-JX661583                                                                                                                                                                                                                                                 | Adams et al. 2013          | [27]             |
| JX976338-JX976339; JX976341-JX976347; JX976349-JX976350; JX976352-JX976357; JX976359-JX976361; JX976363-JX976365; KC283043-KC283043                                                                                                                               | Valdes et al. 2012         | §                |
| KC297233-KC297421                                                                                                                                                                                                                                                 | Cui et al. 2013            | [28]             |
| KC342349-KC342449                                                                                                                                                                                                                                                 | Auksornkitti et al. 2014   | [29]             |
| KC461212-KC461213                                                                                                                                                                                                                                                 | Cui et al. 2013            | [30]             |
| KC476656-KC476745                                                                                                                                                                                                                                                 | Pretorius et al. 2013      | [31]             |
| KC559440-KC559448                                                                                                                                                                                                                                                 | Cui et al. 2013            | [28]             |
| KC677854-KC677859; KC677861-KC677863; KC677865-KC677867; KC677870; KC677872; KC677874; KC677876-KC677877                                                                                                                                                          | Valdes et al. 2013         | §                |
| KC731482-KC731483; KC754738-KC754739; KC754741-KC754743                                                                                                                                                                                                           | Choudhary et al. 2013      | [32]             |

| Accession Number                                                                                                                                                                                                                                                                     | Author                 | Reference |
|--------------------------------------------------------------------------------------------------------------------------------------------------------------------------------------------------------------------------------------------------------------------------------------|------------------------|-----------|
| KC763335, KC763337, KC763339                                                                                                                                                                                                                                                         | Ali et al. 2013        | §         |
| KC978856                                                                                                                                                                                                                                                                             | Gu et al. 2013         | §         |
| KF156341-KF156522                                                                                                                                                                                                                                                                    | Agoti et al, 2014      | [33]      |
| KF246594,KF246596; KF246604-KF246606; KF246608; KF246612-KF246615; KF246617-KF246618; KF246620; KF246623; KF246638-KF246644;                                                                                                                                                         | Choudhary et al. 2013  | [34]      |
| KF530260-KF530261; KF530268-KF530269; KF826816-KF826817; KF826821; KF826823-KF826824; KF826826-KF826828; KF826830-KF826833; KF826836-KF826838; KF826840-KF826841; KF826846-KF826850; KF826852; KF826854-KF826856;                                                                    | Lorenzi et al. 2013    | §         |
| KF587911-KF587912; KF587941-KF587955; KF587961-KF587968; KF587971-KF587972; KF587974-KF587977; KF587982-KF587984; KF587987-KF588001; KF588003; KF588004; KF588007-KF588014;                                                                                                          | Agoti et al, 2014      | [35]      |
| KF915152-KF915266                                                                                                                                                                                                                                                                    | Casas et al. 2013      | §         |
| KJ627245-KJ627246; KJ627248; KJ627250; KJ627252-KJ627253; KJ627255-KJ627261; KJ627263-KJ627264; KJ627266-KJ627276; KJ627279; KJ627281-KJ627284; KJ627286-KJ627298; KJ627300-KJ627301; KJ627303-KJ627309; KJ627311-KJ627316; KJ627318-KJ627322; KJ627324-KJ627329; KJ627333-KJ627339  | Wentworth et al, 2014  | §         |
| KJ672424; KJ672426-KJ672429; KJ672431-KJ672437; KJ672439-KJ672472; KJ672474-KJ672475; KJ672477-KJ672480; KJ672482-KJ672484; KJ723461; KJ723462; KJ723464-KJ723465; KJ723467-KJ723468; KJ723472-KJ723475; KJ723478; KJ723483; KJ723486-KJ723492; KM042381-KM042386; KM042388-KM042392 | Das et al. 2014        | §         |
| KJ961514-KJ961518; KJ961520-KJ961522; KJ961525-KJ961536                                                                                                                                                                                                                              | Martinelli et al. 2014 | [36]      |
| KM402618-KM402671                                                                                                                                                                                                                                                                    | Gimferrer et al. 2014  | §         |
| KM508816-KM508826                                                                                                                                                                                                                                                                    | Espinola et al 2014    | §         |
| KM517572; KM586819-KM586825; KM586827-KM586834; KM586837; KM586839; KM586841-KM586842; KP119745-KP119748; KP218910                                                                                                                                                                   | Xie et al. 2014        | §         |
| Z33410-Z33412; Z33414-Z33432; Z33454-Z33456; Z33493-Z33494                                                                                                                                                                                                                           | García et al. 1994     | [37]      |

§Direct submission to GenBank database. Unpublished data

## References

1. Okamoto M, Sugawara K, Takashita E, et al. Development and evaluation of a whole virus-based enzyme-linked immunosorbent assay for the detection of human metapneumovirus antibodies in human sera. *Journal of virological methods* **2010**; 164:24-9.
2. Kim YJ, Kim DW, Lee WJ, et al. Rapid replacement of human respiratory syncytial virus A with the ON1 genotype having 72 nucleotide duplication in G gene. *Infection, genetics and evolution : journal of molecular epidemiology and evolutionary genetics in infectious diseases* **2014**; 26:103-12.
3. Peret TC, Hall CB, Schnabel KC, Golub JA, Anderson LJ. Circulation patterns of genetically distinct group A and B strains of human respiratory syncytial virus in a community. *The Journal of general virology* **1998**; 79 ( Pt 9):2221-9.
4. Sullender WM, Mufson MA, Prince GA, Anderson LJ, Wertz GW. Antigenic and genetic diversity among the attachment proteins of group A respiratory syncytial viruses that have caused repeat infections in children. *The Journal of infectious diseases* **1998**; 178:925-32.
5. Choi EH, Lee HJ. Genetic diversity and molecular epidemiology of the G protein of subgroups A and B of respiratory syncytial viruses isolated over 9 consecutive epidemics in Korea. *The Journal of infectious diseases* **2000**; 181:1547-56.
6. Frabasile S, Delfraro A, Facal L, et al. Antigenic and genetic variability of human respiratory syncytial viruses (group A) isolated in Uruguay and Argentina: 1993-2001. *Journal of medical virology* **2003**; 71:305-12.
7. Lim CS, Kumarasinghe G, Chow VT. Sequence and phylogenetic analysis of SH, G, and F genes and proteins of Human respiratory syncytial virus isolates from Singapore. *Acta virologica* **2003**; 47:97-104.
8. Zlateva KT, Lemey P, Vandamme AM, Van Ranst M. Molecular evolution and circulation patterns of human respiratory syncytial virus subgroup a: positively selected sites in the attachment g glycoprotein. *Journal of virology* **2004**; 78:4675-83.
9. Scott PD, Ochola R, Ngama M, et al. Molecular epidemiology of respiratory syncytial virus in Kilifi district, Kenya. *Journal of medical virology* **2004**; 74:344-54.
10. de Sierra M, Arbiza J. Genetic stability of the attachment glycoprotein of human respiratory syncytial viruses during serial passages in cell cultures. *Acta virologica* **2004**; 48:115-21.
11. Scott PD, Ochola R, Ngama M, et al. Molecular analysis of respiratory syncytial virus reinfections in infants from coastal Kenya. *The Journal of infectious diseases* **2006**; 193:59-67.
12. Viegas M, Mistchenko AS. Molecular epidemiology of human respiratory syncytial virus subgroup A over a six-year period (1999-2004) in Argentina. *Journal of medical virology* **2005**; 77:302-10.
13. Lo MS, Brazas RM, Holtzman MJ. Respiratory syncytial virus nonstructural proteins NS1 and NS2 mediate inhibition of Stat2 expression and alpha/beta interferon responsiveness. *Journal of virology* **2005**; 79:9315-9.
14. Zlateva KT, Vijgen L, Dekeersmaeker N, Naranjo C, Van Ranst M. Subgroup prevalence and genotype circulation patterns of human respiratory syncytial virus in Belgium during ten successive epidemic seasons. *Journal of clinical microbiology* **2007**; 45:3022-30.
15. Montieri S, Puzelli S, Ciccozzi M, et al. Amino acid changes in the attachment G glycoprotein of human respiratory syncytial viruses (subgroup A) isolated in Italy over several epidemics (1997-2006). *Journal of medical virology* **2007**; 79:1935-42.
16. Widjoatmodjo MN, Boes J, van Bers M, van Remmerden Y, Roholl PJ, Luytjes W. A highly attenuated recombinant human respiratory syncytial virus lacking the G protein induces long-lasting protection in cotton rats. *Virology journal* **2010**; 7:114.
17. Baek YH, Choi EH, Song MS, et al. Prevalence and genetic characterization of respiratory syncytial virus (RSV) in hospitalized children in Korea. *Archives of virology* **2012**; 157:1039-50.
18. Gaunt ER, Jansen RR, Poovorawan Y, Templeton KE, Toms GL, Simmonds P. Molecular epidemiology and evolution of human respiratory syncytial virus and human metapneumovirus. *PloS one* **2011**; 6:e17427.

19. Almajhdi FN, Farrag MA, Amer HM. Genetic diversity in the G protein gene of group A human respiratory syncytial viruses circulating in Riyadh, Saudi Arabia. *Archives of virology* **2014**; 159:73-81.
20. Rebuffo-Scheer C, Bose M, He J, et al. Whole genome sequencing and evolutionary analysis of human respiratory syncytial virus A and B from Milwaukee, WI 1998-2010. *PloS one* **2011**; 6:e25468.
21. Balmaks R, Ribakova I, Gardovska D, Kazaks A. Molecular epidemiology of respiratory syncytial virus during the 2009-2010 season in Latvia. *Archives of virology* **2013**; 158:1089-92.
22. Eshaghi A, Duvvuri VR, Lai R, et al. Genetic variability of human respiratory syncytial virus A strains circulating in Ontario: a novel genotype with a 72 nucleotide G gene duplication. *PloS one* **2012**; 7:e32807.
23. Tan L, Lemey P, Houspie L, et al. Genetic variability among complete human respiratory syncytial virus subgroup A genomes: bridging molecular evolutionary dynamics and epidemiology. *PloS one* **2012**; 7:e51439.
24. Tapia LI, Shaw CA, Aideyan LO, et al. Gene sequence variability of the three surface proteins of human respiratory syncytial virus (HRSV) in Texas. *PloS one* **2014**; 9:e90786.
25. Lee WJ, Kim YJ, Kim DW, Lee HS, Lee HY, Kim K. Complete genome sequence of human respiratory syncytial virus genotype A with a 72-nucleotide duplication in the attachment protein G gene. *Journal of virology* **2012**; 86:13810-1.
26. Houspie L, Lemey P, Keyaerts E, et al. Circulation of HRSV in Belgium: from multiple genotype circulation to prolonged circulation of predominant genotypes. *PloS one* **2013**; 8:e60416.
27. Adams O, Wermirzowsky J, Hengel H. Genetic analysis and antigenic characterization of human respiratory syncytial virus group A viruses isolated in Germany 1996-2008. *Virus genes* **2013**; 47:210-8.
28. Cui G, Zhu R, Qian Y, et al. Genetic variation in attachment glycoprotein genes of human respiratory syncytial virus subgroups a and B in children in recent five consecutive years. *PloS one* **2013**; 8:e75020.
29. Auksornkitti V, Kamprasert N, Thongkomplew S, et al. Molecular characterization of human respiratory syncytial virus, 2010-2011: identification of genotype ON1 and a new subgroup B genotype in Thailand. *Archives of virology* **2014**; 159:499-507.
30. Cui G, Qian Y, Zhu R, et al. Emerging human respiratory syncytial virus genotype ON1 found in infants with pneumonia in Beijing, China. *Emerg Microbes Infect* **2013**; 2:e22.
31. Pretorius MA, van Niekerk S, Tempia S, et al. Replacement and positive evolution of subtype A and B respiratory syncytial virus G-protein genotypes from 1997-2012 in South Africa. *The Journal of infectious diseases* **2013**; 208 Suppl 3:S227-37.
32. Choudhary ML, Wadhwa BS, Jadhav SM, Chadha MS. Complete Genome Sequences of Two Human Respiratory Syncytial Virus Genotype A Strains from India, RSV-A/NIV1114046/11 and RSV-A/NIV1114073/11. *Genome announcements* **2013**; 1.
33. Agoti CN, Mayieka LM, Otieno JR, et al. Examining strain diversity and phylogeography in relation to an unusual epidemic pattern of respiratory syncytial virus (RSV) in a long-term refugee camp in Kenya. *BMC infectious diseases* **2014**; 14:178.
34. Choudhary ML, Anand SP, Wadhwa BS, Chadha MS. Genetic variability of human respiratory syncytial virus in Pune, Western India. *Infection, genetics and evolution : journal of molecular epidemiology and evolutionary genetics in infectious diseases* **2013**; 20:369-77.
35. Agoti CN, Otieno JR, Gitahi CW, Cane PA, Nokes DJ. Rapid spread and diversification of respiratory syncytial virus genotype ON1, Kenya. *Emerging infectious diseases* **2014**; 20:950-9.
36. Martinelli M, Frati ER, Zappa A, et al. Phylogeny and population dynamics of respiratory syncytial virus (Rsv) A and B. *Virus research* **2014**; 189:293-302.
37. Garcia O, Martin M, Dopazo J, et al. Evolutionary pattern of human respiratory syncytial virus (subgroup A): cocirculating lineages and correlation of genetic and antigenic changes in the G glycoprotein. *Journal of virology* **1994**; 68:5448-59.
